# Supplementary material for: Fabrication of a novel magnetic metal–organic framework functionalized with 2-aminothiophenol for preconcentration of trace silver amounts in water and wastewater
Source: Royal Society of Chemistry journal article supplement (doi:10.1039/d1ra00420d), 2021-01-01
Supplement: d1ra00420d1.pdf [file d1ra00420d1.pdf]

21

22**Table S1**

23ANOVA results obtained from uptake step.

| Source                 | Sum of Squares | d.f. <sup>a</sup> | Mean Square | F-ratio | p-value  | Effect      |                 |
|------------------------|----------------|-------------------|-------------|---------|----------|-------------|-----------------|
| Model                  | 4166.61        | 9                 | 462.96      | 193.27  | < 0.0001 | Significant |                 |
| A-pH                   | 1934.42        | 1                 | 1934.42     | 807.57  | < 0.0001 |             |                 |
| B- Sorption time       | 45.60          | 1                 | 45.60       | 19.04   | 0.0033   |             |                 |
| C- Sorbent amount      | 51.51          | 1                 | 51.51       | 21.50   | 0.0024   |             |                 |
| AB                     | 3.80           | 1                 | 3.80        | 1.59    | 0.2481   |             |                 |
| AC                     | 1.32           | 1                 | 1.32        | 0.55    | 0.4816   |             |                 |
| BC                     | 0.25           | 1                 | 0.25        | 0.10    | 0.7561   |             |                 |
| A <sup>2</sup>         | 1584.67        | 1                 | 1584.67     | 661.56  | < 0.0001 |             |                 |
| B <sup>2</sup>         | 126.21         | 1                 | 126.21      | 52.69   | 0.0002   |             |                 |
| C <sup>2</sup>         | 264.44         | 1                 | 264.44      | 110.40  | < 0.0001 |             |                 |
| Residual               | 16.77          | 7                 | 2.40        |         |          |             |                 |
| <i>Lack of Fit</i>     | 13.57          | 3                 | 4.52        | 5.65    | 0.0638   |             | Not significant |
| <i>Pure Error</i>      | 3.20           | 4                 | 0.80        |         |          |             |                 |
| Cor Total <sup>b</sup> | 4183.38        | 16                |             |         |          |             |                 |

24 <sup>a</sup> Degree of freedom

25 <sup>b</sup> Cor Total: Totals of all information corrected for the mean.

26  
27  
28  
29  
30  
31  
32  
33  
34  
35  
36  
37  
38  
39  
40  
41  
42  
43  
44  
45  
46  
47  
48  
49  
50

51  
52  
53

54 **Table S2**

55 ANOVA results obtained from elution step.

| Source                  | Sum of Squares | d.f. <sup>a</sup> | Mean Square | F-ratio | p-value  | Effect          |
|-------------------------|----------------|-------------------|-------------|---------|----------|-----------------|
| Model                   | 3160.52        | 9                 | 351.17      | 62.57   | < 0.0001 | Significant     |
| A-Elution time          | 44.55          | 1                 | 44.55       | 7.94    | 0.0259   |                 |
| B- Eluent concentration | 84.00          | 1                 | 84.00       | 14.97   | 0.0061   |                 |
| C- Eluent volume        | 348.30         | 1                 | 348.30      | 62.06   | 0.0001   |                 |
| AB                      | 18.06          | 1                 | 18.06       | 3.22    | 0.1159   |                 |
| AC                      | 0.25           | 1                 | 0.25        | 0.045   | 0.8389   |                 |
| BC                      | 1.00           | 1                 | 1.00        | 0.18    | 0.6856   |                 |
| A <sup>2</sup>          | 718.44         | 1                 | 718.44      | 128.01  | < 0.0001 |                 |
| B <sup>2</sup>          | 538.83         | 1                 | 538.83      | 96.01   | < 0.0001 |                 |
| C <sup>2</sup>          | 765.95         | 1                 | 765.95      | 136.47  | < 0.0001 |                 |
| Residual                | 39.29          | 7                 | 5.61        |         |          |                 |
| <i>Lack of Fit</i>      | 32.49          | 3                 | 10.83       | 6.37    | 0.0528   | Not significant |
| <i>Pure Error</i>       | 6.80           | 4                 | 1.70        |         |          |                 |
| Cor Total <sup>b</sup>  | 3199.80        | 16                |             |         |          |                 |

56 <sup>a</sup> Degree of freedom

57 <sup>b</sup> Cor Total: Totals of all information corrected for the mean.

58
